# Supplementary material
Source: PubMed Central journal article supplement (PMC7230002)
Supplement: NIHMS1548756-supplement-Supplemental_Data_File___doc___tif__pdf__etc__.pdf [file NIHMS1548756-supplement-Supplemental_Data_File___doc___tif__pdf__etc__.pdf]

**Supplemental Table 1. Changes in health care access per year for low-income non-elderly adults in all states\*, expansion states, and non-expansion states.<sup>ff</sup>**

|                                         | <b>n</b> | <b>Baseline 2012 (%)</b> | <b>Change per year (%; 95% CI)</b> | <b>p-value</b> |
|-----------------------------------------|----------|--------------------------|------------------------------------|----------------|
| <b>Have health care coverage</b>        |          |                          |                                    |                |
| All states                              | 496,236  | 59.6                     | 3.4 (3.3 to 3.6)                   | <0.001         |
| Expansion states                        | 251,719  | 62.4                     | 3.9 (3.8 to 4.1)                   | <0.001         |
| Non-expansion states                    | 244,517  | 56.5                     | 2.8 (2.5 to 3.0)                   | <0.001         |
| <b>Have a personal doctor</b>           |          |                          |                                    |                |
| All states                              | 496,147  | 60.0                     | 1.2 (1.0 to 1.3)                   | <0.001         |
| Expansion states                        | 251,634  | 62.0                     | 1.5 (1.3 to 1.7)                   | <0.001         |
| Non-expansion states                    | 244,513  | 57.6                     | 0.8 (0.6 to 1.1)                   | <0.001         |
| <b>Routine checkup within past year</b> |          |                          |                                    |                |
| All states                              | 482,144  | 56.5                     | 1.4 (1.2 to 1.6)                   | <0.001         |
| Expansion states                        | 245,202  | 56.4                     | 1.6 (1.4 to 1.8)                   | <0.001         |
| Non-expansion states                    | 236,942  | 56.6                     | 1.1 (0.9 to 1.4)                   | <0.001         |

Results from unadjusted linear regression.

\*Delaware, District of Columbia, Massachusetts, New York, and Vermont were excluded.

<sup>ff</sup>Expansion states (n = 24) were Arizona, Arkansas, California, Colorado, Connecticut, Hawaii, Illinois, Indiana, Iowa, Kentucky, Maryland, Michigan, Minnesota, Nevada, New Hampshire, New Jersey, New Mexico, North Dakota, Ohio, Oregon, Pennsylvania, Rhode Island, Washington, West Virginia

Non-expansion states (n = 19) were Alabama, Florida, Georgia, Idaho, Kansas, Maine, Mississippi, Missouri, Nebraska, North Carolina, Oklahoma, South Carolina, South Dakota, Tennessee, Texas, Utah, Virginia, Wisconsin, and Wyoming.

Alaska, Louisiana, and Montana were included as non-expansion states for the immediate 2014-2015 time period, and expansion states for the late 2016-2017 time period.

**Supplemental Table 2. Changes in preventative health care services per year for low-income non-elderly adults in all states\*, expansion states, and non-expansion states.<sup>ff</sup>**

|                                      | n       | Baseline <sup>†</sup><br>(%) | Change per year<br>(%, 95% CI) | p-value |
|--------------------------------------|---------|------------------------------|--------------------------------|---------|
| <b>Cancer Screening</b>              |         |                              |                                |         |
| <b>Breast Cancer Screening</b>       |         |                              |                                |         |
| All states                           | 54,094  | 64.8                         | 1.2 (0.7 to 1.7)               | <0.001  |
| Expansion states                     | 27,006  | 66.5                         | 1.1 (0.5 to 1.8)               | <0.001  |
| Non-expansion states                 | 27,088  | 62.9                         | 1.2 (0.4 to 2.0)               | 0.002   |
| <b>Cervical Cancer Screening</b>     |         |                              |                                |         |
| All states                           | 142,917 | 73.6                         | -1.1 (-1.4 to -0.8)            | <0.001  |
| Expansion states                     | 71,120  | 74.0                         | -1.1 (-1.5 to -0.7)            | <0.001  |
| Non-expansion states                 | 71,797  | 73.2                         | -1.2 (-1.6 to -0.8)            | <0.001  |
| <b>Colorectal Cancer Screening</b>   |         |                              |                                |         |
| All states                           | 99,170  | 45.4                         | 1.6 (1.2 to 2.0)               | <0.001  |
| Expansion states                     | 50,368  | 46.6                         | 1.6 (1.1 to 2.1)               | <0.001  |
| Non-expansion states                 | 48,802  | 44.1                         | 1.5 (0.9 to 2.1)               | <0.001  |
| <b>Cardiovascular Risk Reduction</b> |         |                              |                                |         |
| <b>Serum Cholesterol Screening</b>   |         |                              |                                |         |
| All states                           | 137,121 | 73.4                         | 1.7 (1.4 to 1.9)               | <0.001  |
| Expansion states                     | 68,934  | 72.8                         | 1.7 (1.3 to 2.1)               | <0.001  |
| Non-expansion states                 | 68,187  | 74.0                         | 1.6 (1.2 to 2.0)               | <0.001  |
| <b>Serum Cholesterol Monitoring</b>  |         |                              |                                |         |
| All states                           | 108,215 | 81.1                         | 1.5 (1.2 to 1.7)               | <0.001  |
| Expansion states                     | 53,387  | 80.6                         | 1.7 (1.3 to 2.0)               | <0.001  |
| Non-expansion states                 | 54,828  | 81.7                         | 1.2 (0.8 to 1.6)               | <0.001  |
| <b>Aspirin Use</b>                   |         |                              |                                |         |
| All states                           | 70,336  | 10.1                         | -1.6 (-1.8 to -1.4)            | <0.001  |
| Expansion states                     | 35,876  | 5.5                          | -0.6 (-0.8 to -0.5)            | <0.001  |
| Non-expansion states                 | 34,460  | 15.4                         | -2.7 (-3.1 to -2.3)            | <0.001  |
| <b>Diabetes Care</b>                 |         |                              |                                |         |
| <b>Serum Cholesterol Monitoring</b>  |         |                              |                                |         |
| All states                           | 29,140  | 89.2                         | 0.2 (-0.2 to 0.7)              | 0.311   |
| Expansion states                     | 14,206  | 91.0                         | -0.1 (-0.7 to 0.4)             | 0.638   |
| Non-expansion states                 | 14,934  | 87.2                         | 0.6 (-0.1 to 1.4)              | 0.104   |
| <b>HbA1c Monitoring</b>              |         |                              |                                |         |
| All states                           | 27,503  | 73.7                         | 1.8 (1.3 to 2.3)               | <0.001  |

|                              |         |      |                   |        |
|------------------------------|---------|------|-------------------|--------|
| Expansion states             | 14,446  | 75.8 | 1.4 (0.8 to 2.0)  | <0.001 |
| Non-expansion states         | 13,057  | 72.0 | 2.1 (1.4 to 2.9)  | <0.001 |
| <b>Foot Examination</b>      |         |      |                   |        |
| All states                   | 27,305  | 66.4 | 0.7 (0.1 to 1.3)  | 0.019  |
| Expansion states             | 14,330  | 67.1 | 0.6 (-0.0 to 1.3) | 0.068  |
| Non-expansion states         | 12,975  | 65.9 | 0.7 (-0.2 to 1.6) | 0.115  |
| <b>Eye Examination</b>       |         |      |                   |        |
| All states                   | 27,502  | 53.3 | 0.7 (0.1 to 1.4)  | 0.016  |
| Expansion states             | 14,445  | 54.1 | 0.9 (0.2 to 1.7)  | 0.011  |
| Non-expansion states         | 13,057  | 52.7 | 0.6 (-0.3 to 1.5) | 0.217  |
| <b>Influenza Vaccination</b> |         |      |                   |        |
| All states                   | 57,882  | 40.5 | 0.2 (-0.3 to 0.6) | 0.537  |
| Expansion states             | 28,779  | 40.9 | 0.2 (-0.5 to 0.8) | 0.572  |
| Non-expansion states         | 29,103  | 40.1 | 0.1 (-0.6 to 0.8) | 0.762  |
| <b>Pneumonia Vaccination</b> |         |      |                   |        |
| All states                   | 57,882  | 38.6 | 0.3 (-0.1 to 0.8) | 0.155  |
| Expansion states             | 28,779  | 38.4 | 0.4 (-0.2 to 1.0) | 0.218  |
| Non-expansion states         | 29,103  | 38.8 | 0.3 (-0.4 to 1.0) | 0.427  |
| <b>Other Primary Care</b>    |         |      |                   |        |
| <b>Influenza Vaccination</b> |         |      |                   |        |
| All states                   | 461,182 | 24.6 | 0.8 (0.7 to 0.9)  | <0.001 |
| Expansion states             | 232,426 | 24.7 | 0.9 (0.7 to 1.1)  | <0.001 |
| Non-expansion states         | 228,756 | 24.5 | 0.6 (0.4 to 0.8)  | <0.001 |
| <b>Alcohol Use Screening</b> |         |      |                   |        |
| All states                   | 22,558  | 78.0 | 1.4 (0.7 to 2.1)  | <0.001 |
| Expansion states             | 16,115  | 77.1 | 1.8 (0.9 to 2.7)  | <0.001 |
| Non-expansion states         | 6,443   | 79.9 | 0.5 (-0.5 to 1.5) | 0.309  |
| <b>HIV Screening</b>         |         |      |                   |        |
| All states                   | 459,036 | 46.6 | 0.3 (0.2 to 0.5)  | <0.001 |
| Expansion states             | 232,416 | 43.6 | 0.6 (0.4 to 0.8)  | <0.001 |
| Non-expansion states         | 226,620 | 50.1 | 0.1 (-0.1 to 0.4) | 0.407  |

Results from linear regression. All estimates are adjusted for patient age and sex.

Breast cancer screening and cervical cancer screening were adjusted for age only.

Aspirin use was additionally adjusted for race/ethnicity, smoking status, hypertension, hyperlipidemia, diabetes, coronary heart disease or angina, stroke, and myocardial infarction.

Regression results include years 2013, 2015, and 2017 for cholesterol outcomes and 2014 and 2017 alcohol use screening.

\*Delaware, District of Columbia, Massachusetts, New York, and Vermont were excluded.

∩∩ Expansion states (n = 24) were Arizona, Arkansas, California, Colorado, Connecticut,

Hawaii, Illinois, Indiana, Iowa, Kentucky, Maryland, Michigan, Minnesota, Nevada, New Hampshire, New Jersey, New Mexico, North Dakota, Ohio, Oregon, Pennsylvania, Rhode Island, Washington, West Virginia

Non-expansion states (n = 19) were Alabama, Florida, Georgia, Idaho, Kansas, Maine, Mississippi, Missouri, Nebraska, North Carolina, Oklahoma, South Carolina, South Dakota, Tennessee, Texas, Utah, Virginia, Wisconsin, and Wyoming.

Alaska, Louisiana, and Montana were included as non-expansion states for the immediate 2014-2015 time period, and expansion states for the late 2016-2017 time period.

†Baseline results are from 2013 for cholesterol outcomes, 2014 for alcohol use screening, and 2012 for all other outcomes.

**Supplemental Table 3. Years in which outcomes were included in BRFSS survey.**

| <b>Preventative Health Service</b>   | <b>Years in BRFSS</b> |
|--------------------------------------|-----------------------|
| <b>Cancer Screening</b>              |                       |
| Breast cancer screening              | 2012-2016             |
| Cervical cancer screening            | 2012-2016             |
| Colorectal cancer screening          | 2012-2016             |
| <b>Cardiovascular Risk Reduction</b> |                       |
| Serum cholesterol screening          | 2013, 2015, 2017      |
| Serum cholesterol monitoring         | 2013, 2015, 2017      |
| Aspirin use                          | 2013, 2015, 2017      |
| <b>Diabetes care</b>                 |                       |
| Serum cholesterol monitoring         | 2013, 2015, 2017      |
| HbA1c monitoring                     | 2012-2017             |
| Foot examination                     | 2012-2017             |
| Eye examination                      | 2012-2017             |
| Influenza vaccination                | 2012-2017             |
| Pneumonia vaccination                | 2012-2017             |
| <b>Other Primary Care</b>            |                       |
| Influenza vaccination                | 2012-2017             |
| Alcohol use screening                | 2014, 2017            |
| HIV screening                        | 2012-2017             |
